# Supplementary material for: Enhancing the photocatalytic H2evolution activity of red phosphorous by using noble-metal-free Ni(OH)2under photoexcitation up to 700 nm
Source: Royal Society of Chemistry journal article supplement (doi:10.1039/c4ra06867j), 2014-09-09
Supplement: c4ra06867j1.pdf [file c4ra06867j1.pdf]

## Electronic Supplementary Information (ESI)

Enhancing the photocatalytic H<sub>2</sub> evolution activity of red phosphorous by using noble-metal-free Ni(OH)<sub>2</sub> under photoexcitation up to 700 nm

Haifeng Dang,<sup>ab</sup> Xinfu Dong,<sup>a\*</sup> Yingchao Dong,<sup>cd</sup> Hongbo Fan<sup>b</sup> and Yongfu Qiu<sup>b</sup>

a School of Chemistry and Chemical Engineering, South China University of Technology, Guangzhou 510640, PR China

b College of Chemistry and Environmental Engineering, Dongguan University of Technology, Guangdong 523808, PR China

c Institute of Urban Environment, Chinese Academy of Sciences, PR China

d Ningbo Urban Environment Observation and Research Station-NUEORS, Chinese Academy of Sciences, P R China

\*Corresponding author. E-mail: cexfdong@scut.edu.cn; Tel: +86 20 87110659

## **Experimental Section**

### **Synthesis of crystalline red phosphorus (P)**

Commercial red phosphorus was ground into a fine, homogeneous powder slightly and then crystallized at 400 °C for 2 h in Ar atmosphere. The crystallized product was washed with distilled water and then dried at 80 °C overnight.

### **Synthesis of Ni(OH)<sub>2</sub>/P and Pt/P**

Ni(OH)<sub>2</sub>/P composites were prepared by a simple precipitation method. Typically, 0.5 g of crystalline red P was dispersed in 50 mL of NaOH aqueous solution (0.5 M) under vigorous stirring followed by ultrasonic-dispersion for 1 h. Then 0.005 M Ni(NO<sub>3</sub>)<sub>2</sub> aqueous solution was added dropwise under vigorous stirring. After the reaction was completed and the suspension was continuously stirred for 1 h, the resulting precipitates were filtered, washed with distilled water several times and dried at 80 °C overnight. By changing the amount of Ni(NO<sub>3</sub>)<sub>2</sub>, samples with various weight percentages (theoretical) of Ni(OH)<sub>2</sub> (0, 0.2, 0.5, 1, 3 and 10 wt%) were synthesized, and hereafter were denoted as N0, N0.2, N0.5, N1, N3 and N10, respectively. For comparison, we also prepared pure Ni(OH)<sub>2</sub> sample using the same experimental procedures, and the resultant Ni(OH)<sub>2</sub> sample was denoted as N100. Various contents of Pt loaded crystalline red P samples (weight ratios: 0, 0.2, 0.5, 0.7, 1.0 and 2.0 wt%) were synthesized by photochemical reduction of H<sub>2</sub>PtCl<sub>6</sub> in presence of crystalline red P aqueous suspension. The corresponding samples were denoted as Pt0, Pt0.2, Pt0.5, Pt0.7, Pt1.0 and Pt2.0, respectively.

## **Characterization**

XRD patterns of the samples were collected in a rotation anode X-ray diffractionmeter (D8 Advance, Germany) with Cu-K $\alpha$  radiation. UV-vis DRS were obtained by using a UV-vis spectrophotometer (U-3010, Hitachi, Japan). XPS (X-ray photoelectron spectroscopy) measurements were recorded on a Kratos Axis Ultra DLD equipped with Al-K $\alpha$  radiation ( $h\nu = 1486.6$  eV). Scanning electron microscopy (SEM) images were obtained using a LEO 1530VP field-emission scanning electron microscope. Transmission electron microscopy (TEM) observations were conducted with a JEM-2010F electron microscope (JEOL, Japan).

## **Photocatalytic H<sub>2</sub> evolution activity**

Water splitting reactions were carried out in a top-irradiation quartz reactor connected to a gas-closed circulation system in vacuum. A 300 W Xe lamp (PLS-SXE-300UV, Trusttech) equipped with a cut-off filter ( $\lambda < 400$  nm) to remove ultraviolet light was used as the light source. 50 mg of the photocatalyst was dispersed in a 100 mL of aqueous solution containing 5 mL of methanol as the sacrificial reagent. The evolved H<sub>2</sub> was analyzed by a gas chromatograph equipped with a thermal conductivity detector (GC9800, N<sub>2</sub> carrier, TDX-01 column).

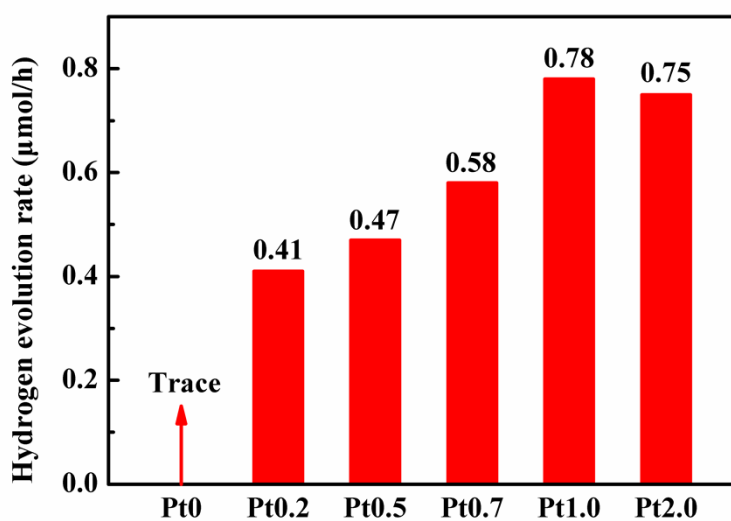

Fig. S1 Effect of Pt content on photocatalytic H<sub>2</sub> evolution activity of red P from methanol aqueous solution under visible light irradiation ( $\lambda \geq 400$  nm). (Reaction conditions: photocatalyst, 50 mg; 5 vol% methanol aqueous solution, 100 mL; light source, 300W Xe-lamp equipped with a 400 nm cut-off filter).

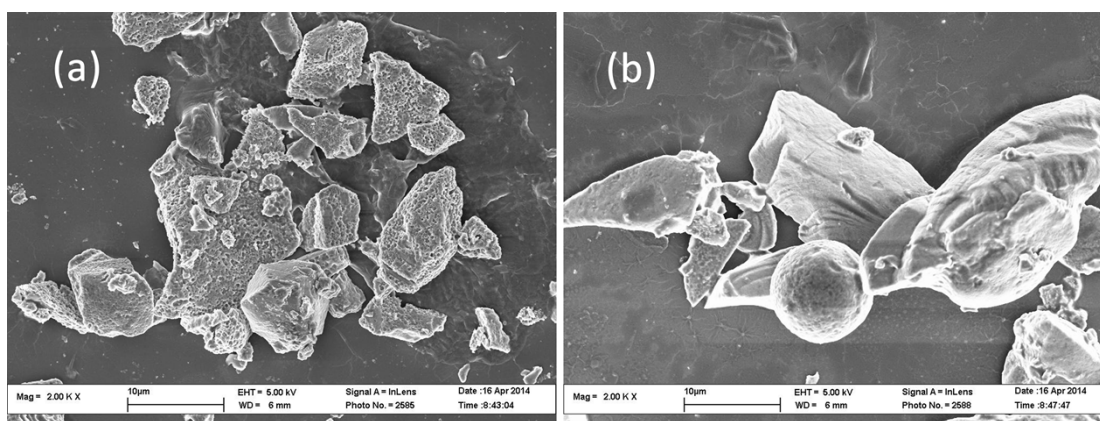

Fig. S2 SEM images of (a) N0 and (b) N0.5 samples.

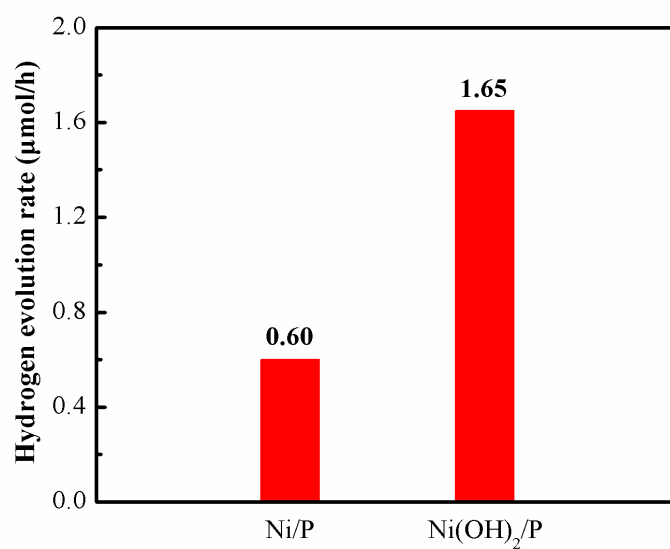

Fig. S3 A comparison of photocatalytic H<sub>2</sub> evolution activity of Ni/P and Ni(OH)<sub>2</sub>/P samples from methanol aqueous solution under visible light irradiation ( $\lambda \geq 400$  nm).

Ni atoms-loaded red P sample was synthesised using KBH<sub>4</sub> as reduction reagents.

(Reaction conditions: photocatalyst, 50 mg; 5 vol% methanol aqueous solution, 100 mL; light source, 300W Xe-lamp equipped with a 400 nm cut-off filter).
